# Supplementary material for: phyloseq: An R Package for Reproducible Interactive Analysis and Graphics of Microbiome Census Data
Source: PubMed Central journal article supplement (PMC3632530; doi:10.1371/journal.pone.0061217), 2013-04-22
Supplement: pone.0061217.s001.pdf [file pone.0061217.s001.pdf]

| Category            | Capability                                     | phyloseq | QIIME  | mothur | OTUbase/mcaGUI |
|---------------------|------------------------------------------------|----------|--------|--------|----------------|
| Sequence Processing | decode barcoded reads                          | -        | +      | +      | -              |
|                     | cluster sequence reads into OTUs               | -        | +      | +      | -              |
|                     | chimera filtering                              | -        | +      | +      | -              |
| Phylogenetics       | reference alignment of OTU reps                | -        | +      | +      | -              |
|                     | taxonomic classification                       | -        | +      | +      | -              |
|                     | store/manipulate phylogenetic trees            | +        | +      | +      | -              |
| Ecology             | multiple community distance/similarity metrics | +        | +      | +      | +              |
|                     | parallel Weighted and Unweighted UniFrac       | +        | +      | +      | -              |
| Ordination          | principal coordinates analysis (MDS/PCoA)      | +        | +      | +      | +              |
|                     | nonmetric multidimensional scaling (NMDS)      | +        | +      | +      | -              |
|                     | principal components analysis (PCA)            | +        | -      | +      | -              |
|                     | CA, DCA, RDA, DPCoA                            | +        | -      | -      | -              |
| Graphics            | ordination plot                                | +        | P      | +      | P              |
|                     | heat map                                       | +        | +      | +      | -              |
|                     | quantitative abundance bar/pie plot            | +        | +      | -      | +              |
|                     | multi-sample richness estimates plot           | +        | +      | -      | +              |
|                     | annotated tree plot                            | +        | -      | +      | -              |
|                     | network plot                                   | +        | -      | -      | -              |
| Validation          | integration with object oriented graphics      | +        | -      | -      | -              |
|                     | multiple inference correction                  | +        | -      | -      | -              |
| Reproducibility     | tools for collaboration/reproduction/sharing   | R        | iP     | S      | R              |
| Computation         | language interface                             | R        | python | C++    | R              |
| Documentation       | web-based tutorials/wiki                       | +        | +      | +      | -              |

P – PCoA-only

R – R Flavored Markdown, Sweave, etc.

iP – iPython Notebook, etc.

S – shell scripts
